# Supplementary material for: Prospective Predictive Performance Comparison between Clinical Gestalt and Validated COVID-19 Mortality Scores
Source: HighWire-hosted journal article supplement (doi:10.1136/jim-2021-002037), 2021-10-07
Supplement: jim-2021-002037supp001_data_supplement.pdf [file jim-2021-002037supp001_data_supplement.pdf]

Appendix table 1.

| Cases in which the predicted probability of death was $\leq 30\%$                                                                                                 | AUROC (95% CI)<br>N=92  |
|-------------------------------------------------------------------------------------------------------------------------------------------------------------------|-------------------------|
| Clinical Gestalt – Predicted probability of death                                                                                                                 | 0.65 (0.52-0.79)        |
| LOW-HARM score                                                                                                                                                    | 0.79 (0.68-0.90)        |
| LOW-HARM score v2                                                                                                                                                 | 0.80 (0.70-0.90)        |
| NUTRI-CoV                                                                                                                                                         | 0.71 (0.57-0.84)        |
| MSL-COVID-19                                                                                                                                                      | 0.58 (0.43-0.72)        |
| qSOFA                                                                                                                                                             | 0.60 (0.46-0.73)        |
| NEWS-2                                                                                                                                                            | 0.64 (0.47-0.80)        |
| Neutrophil:Lymphocyte ratio                                                                                                                                       | 0.61 (0.48-0.74)        |
| Overall AUROC comparison test=0.006                                                                                                                               |                         |
| Individual AUROC comparisons:                                                                                                                                     |                         |
| - Clinical Gestalt vs LOW-HARM scores/NUTRI-CoV/MSL-COVID-19/qSOFA/NEWS-2/Neutrophil:Lymphocyte ratio, $p > 0.1$ for all                                          |                         |
| Cases in which the predicted probability of death was $> 30\%$                                                                                                    | AUROC (95% CI)<br>N=74  |
| Clinical Gestalt – Predicted probability of death                                                                                                                 | 0.55 (0.41-0.68)        |
| LOW-HARM score                                                                                                                                                    | 0.71 (0.59-0.84)        |
| LOW-HARM score v2                                                                                                                                                 | 0.74 (0.62-0.85)        |
| NUTRI-CoV                                                                                                                                                         | 0.45 (0.32-0.59)        |
| MSL-COVID-19                                                                                                                                                      | 0.65 (0.53-0.78)        |
| qSOFA                                                                                                                                                             | 0.57 (0.46-0.69)        |
| NEWS-2                                                                                                                                                            | 0.64 (0.50-0.77)        |
| Neutrophil:Lymphocyte ratio                                                                                                                                       | 0.66 (0.55-0.77)        |
| Overall AUROC comparison test=0.008                                                                                                                               |                         |
| Individual AUROC comparisons:                                                                                                                                     |                         |
| - Clinical Gestalt vs LOW-HARM score v2, $p = 0.02$                                                                                                               |                         |
| - Clinical Gestalt vs LOW-HARM score/NUTRI-CoV/MSL-COVID-19/qSOFA/NEWS-2/Neutrophil:Lymphocyte ratio, $p > 0.1$ for all, except for LOW-HARM score ( $p = 0.06$ ) |                         |
| Cases in which the confidence of prediction was $\leq 80\%$                                                                                                       | AUROC (95% CI)<br>N=108 |
| Clinical Gestalt – Predicted probability of death                                                                                                                 | 0.63 (0.50-0.74)        |
| LOW-HARM score                                                                                                                                                    | 0.80 (0.71-0.90)        |
| LOW-HARM score v2                                                                                                                                                 | 0.80 (0.71-0.89)        |
| NUTRI-CoV                                                                                                                                                         | 0.63 (0.52-0.74)        |
| MSL-COVID-19                                                                                                                                                      | 0.68 (0.57-0.79)        |
| qSOFA                                                                                                                                                             | 0.58 (0.47-0.69)        |
| NEWS-2                                                                                                                                                            | 0.62 (0.49-0.75)        |
| Neutrophil:Lymphocyte ratio                                                                                                                                       | 0.65 (0.54-0.76)        |
| Overall AUROC comparison test=0.0034                                                                                                                              |                         |
| Individual AUROC comparisons:                                                                                                                                     |                         |
| - Clinical Gestalt vs LOW-HARM scores, $p = 0.01$ for both                                                                                                        |                         |
| - Clinical Gestalt vs NUTRI-CoV/MSL-COVID-19/qSOFA/NEWS-2/Neutrophil:Lymphocyte ratio, $p > 0.05$ for all                                                         |                         |
| Cases in which the confidence of prediction was $> 80\%$                                                                                                          | AUROC (95% CI)<br>N=58  |
| Clinical Gestalt – Predicted probability of death                                                                                                                 | 0.78 (0.66-0.91)        |
| LOW-HARM score                                                                                                                                                    | 0.72 (0.58-0.85)        |
| LOW-HARM score v2                                                                                                                                                 | 0.75 (0.63-0.88)        |
| NUTRI-CoV                                                                                                                                                         | 0.56 (0.40-0.71)        |
| MSL-COVID-19                                                                                                                                                      | 0.57 (0.42-0.72)        |
| qSOFA                                                                                                                                                             | 0.65 (0.52-0.78)        |
| NEWS-2                                                                                                                                                            | 0.71 (0.57-0.85)        |
| Neutrophil:Lymphocyte ratio                                                                                                                                       | 0.65 (0.57-0.73)        |
| Overall AUROC comparison test=0.03                                                                                                                                |                         |
| Individual AUROC comparisons:                                                                                                                                     |                         |
| - Clinical Gestalt vs LOW-HARM scores/NEWS-2/qSOFA/Neutrophil:Lymphocyte ratio, $p > 0.1$ for all                                                                 |                         |
| - Clinical Gestalt vs NUTRI-CoV/MSL-COVID-19, $p = 0.01$ for both                                                                                                 |                         |

| Cases with predicted probability of death $\leq 30\%$ and confidence of prediction $\leq 80\%$                         | AUROC (95% CI)<br>N=55 |
|------------------------------------------------------------------------------------------------------------------------|------------------------|
| <b>Clinical Gestalt – Predicted probability of death</b>                                                               | 0.56 (0.35-0.77)       |
| <b>LOW-HARM score</b>                                                                                                  | 0.84 (0.71-0.96)       |
| <b>LOW-HARM score v2</b>                                                                                               | 0.85 (0.75-0.95)       |
| <b>NUTRI-CoV</b>                                                                                                       | 0.76 (0.62-0.90)       |
| <b>MSL-COVID-19</b>                                                                                                    | 0.69 (0.52-0.87)       |
| <b>qSOFA</b>                                                                                                           | 0.54 (0.34-0.74)       |
| <b>NEWS-2</b>                                                                                                          | 0.61 (0.32-0.88)       |
| <b>Neutrophil:Lymphocyte ratio</b>                                                                                     | 0.63 (0.44-0.81)       |
| <i>Overall AUROC comparison test=0.0005</i>                                                                            |                        |
| <i>Individual AUROC comparisons:</i>                                                                                   |                        |
| <i>- Clinical Gestalt vs LOW-HARM scores/NEWS-2/qSOFA/Neutrophil:Lymphocyte ratio, <math>p &gt; 0.1</math> for all</i> |                        |
| <i>- Clinical Gestalt vs NUTRI-CoV/MSL-COVID-19, <math>p = 0.01</math> for both</i>                                    |                        |
| Cases with $\leq 14$ days of hospitalization (Deaths: 19, Survivors: 60)                                               | AUROC (95% CI)<br>N=79 |
| <b>Clinical Gestalt – Predicted probability of death</b>                                                               | 0.80 (0.69-0.91)       |
| <b>LOW-HARM score</b>                                                                                                  | 0.77 (0.66-0.89)       |
| <b>LOW-HARM score v2</b>                                                                                               | 0.83 (0.74-0.92)       |
| <b>NUTRI-CoV</b>                                                                                                       | 0.71 (0.59-0.83)       |
| <b>MSL-COVID-19</b>                                                                                                    | 0.55 (0.40-0.70)       |
| <b>qSOFA</b>                                                                                                           | 0.71 (0.58-0.83)       |
| <b>NEWS-2</b>                                                                                                          | 0.79 (0.58-0.92)       |
| <b>Neutrophil:lymphocyte ratio</b>                                                                                     | 0.65 (0.53-0.78)       |
| <i>Overall AUROC comparison test=0.0002</i>                                                                            |                        |
| <i>Individual AUROC comparisons:</i>                                                                                   |                        |
| <i>- Clinical Gestalt vs LOW-HARM scores, <math>p &lt; 0.05</math></i>                                                 |                        |
| <i>- Clinical Gestalt vs NUTRI-CoV/MSL-COVID-19/NEWS-2/qSOFA/Neutrophil:Lymphocyte ratio, <math>p &gt; 0.1</math></i>  |                        |
| Cases with $> 14$ days of hospitalization (Deaths: 28, Survivors: 59)                                                  | AUROC (95% CI)<br>N=87 |
| <b>Clinical Gestalt – Predicted probability of death</b>                                                               | 0.55 (0.42-0.68)       |
| <b>LOW-HARM score</b>                                                                                                  | 0.75 (0.64-0.86)       |
| <b>LOW-HARM score v2</b>                                                                                               | 0.73 (0.62-0.85)       |
| <b>NUTRI-CoV</b>                                                                                                       | 0.50 (0.38-0.63)       |
| <b>MSL-COVID-19</b>                                                                                                    | 0.71 (0.60-0.82)       |
| <b>qSOFA</b>                                                                                                           | 0.51 (0.40-0.63)       |
| <b>NEWS-2</b>                                                                                                          | 0.51 (0.37-0.65)       |
| <b>Neutrophil:lymphocyte ratio</b>                                                                                     | 0.63 (0.52-0.74)       |
| <i>Overall AUROC comparison test=0.0026</i>                                                                            |                        |
| <i>Individual AUROC comparisons:</i>                                                                                   |                        |
| <i>- Clinical Gestalt vs LOW-HARM scores/MSL-COVID-19, <math>p &lt; 0.05</math> for all</i>                            |                        |
| <i>- Clinical Gestalt vs NUTRI-CoV/NEWS-2/qSOFA/Neutrophil:lymphocyte ratio, <math>p &gt; 0.1</math> for all</i>       |                        |
