# Supplementary figures and images for: Prospective Predictive Performance Comparison between Clinical Gestalt and Validated COVID-19 Mortality Scores
Source: HighWire-hosted journal article supplement (doi:10.1136/jim-2021-002037), 2021-10-07

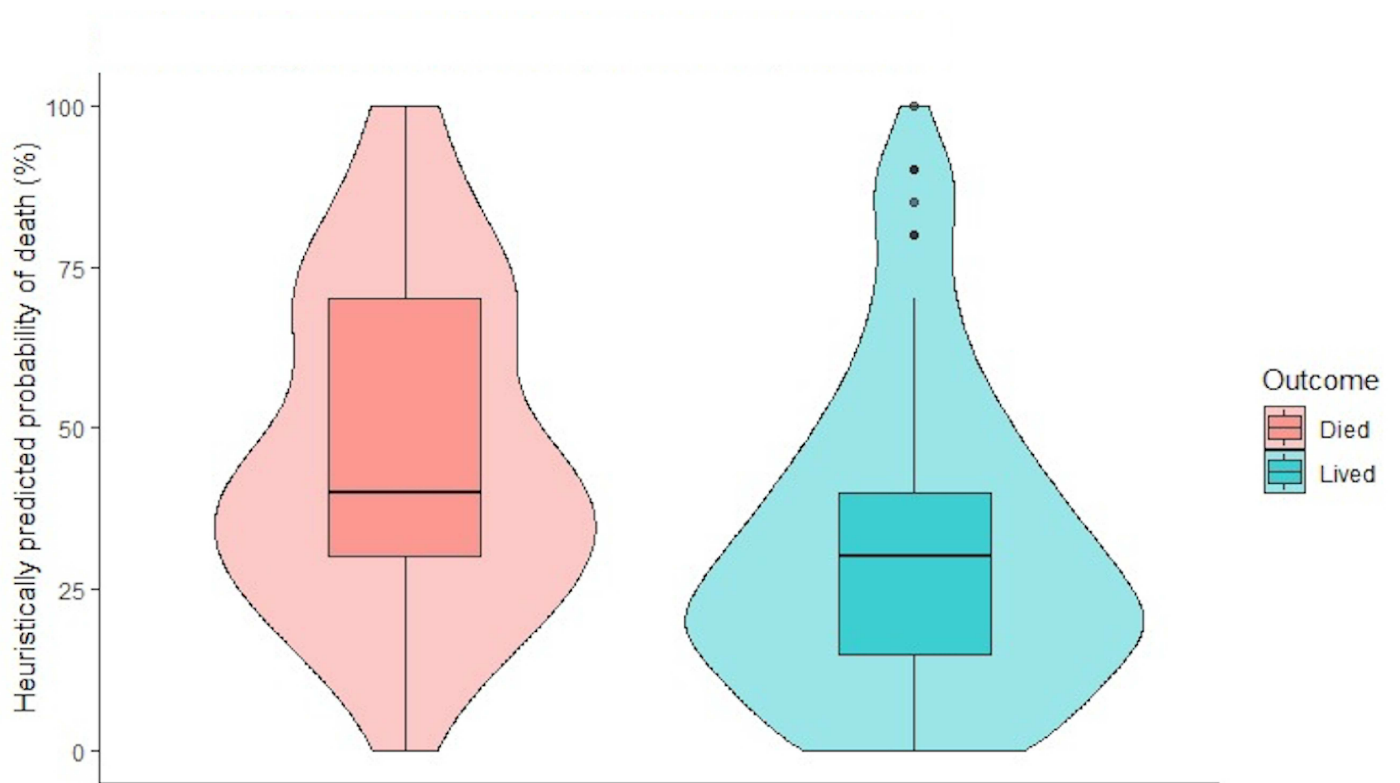

Supplement: jim-2021-002037supp002_data_supplement.pdf [file jim-2021-002037supp002_data_supplement.pdf]
